# Supplementary material for: Structural stability and electronic properties of alkaline-earth metal induced Si(111)-(3 × 2) surfaces
Source: Royal Society of Chemistry journal article supplement (doi:10.1039/c8cp04323j), 2018-01-01
Supplement: c8cp04323j1.pdf [file c8cp04323j1.pdf]

## Supplementary information

In order to understand the surface band states, we further calculated the band-decomposed charge density distributions at  $\bar{\Gamma}$  point near the Fermi level for Ca/Si(111)- $3\times 2$  and Ba/Si(111)- $3\times 2$  surfaces. As shown in Fig. S1(b) and S2(b), for each case the first conduction bands ( $CB_1$ ) have  $\pi^*$  antibonding character between  $p_z$  orbital of the surface Si(C) and Si(D) atoms. The corresponding charge distribution are mainly contributed by the surface Si(C) and Si(D) atoms, while the charge contributions of Si atoms in the second layer and metal atoms are small. Meanwhile, for the first and second valence bands ( $VB_1$  and  $VB_2$ ) we find that there are no charge contribution from Si atoms in the topmost layer and metal atom, and all charge distribution are contributed by the bulk Si atoms. Similar to  $CB_1$ , the third valence bands ( $VB_3$ ) are primarily contributed by the  $d_{xy}$  orbital of metal adatom and the  $p_x$  orbital of surface Si(A) and Si(B) atoms. These results clearly indicate that  $CB_1$  and  $VB_3$  are the surface states, while the  $VB_1$  and  $VB_2$  are not. Therefore, the surface band gap are between  $CB_1$  and  $VB_3$  bands, and the corresponding values are estimated to be 1.65 and 1.66 eV for Ca and Ba, respectively. These values are in good agreement with the experimental data of 1.7 eV for Sr/Si(111)-( $3\times 2$ ) surface. <sup>[1]</sup>

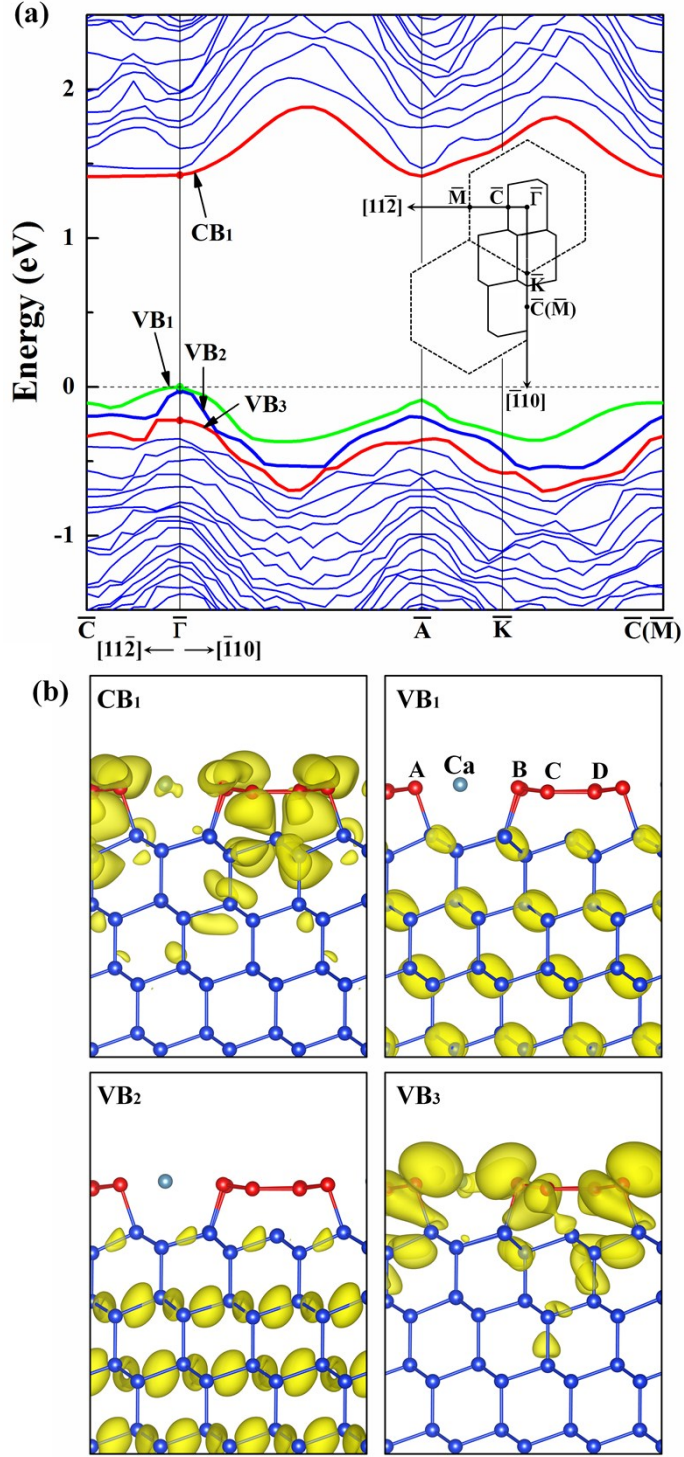

FIG. S1: (a) Calculated electronic band structure of Ca/Si(111)- $3\times 2$  surface using HSE06 functional. Horizontal dotted line gives the Fermi level that is set to zero. (b) The band-decomposed charge density distributions at  $\bar{\Gamma}$  point. VB<sub>1</sub>, VB<sub>2</sub> and VB<sub>3</sub> represent the first, second and third valence band, respectively, and CB<sub>1</sub> represent the first conduction band. The color spacing is  $0.005 e/\text{\AA}^3$ . The Si atoms in the first layer

are plotted in red, the other Si atoms are in blue, and the AEM atoms are in grey.

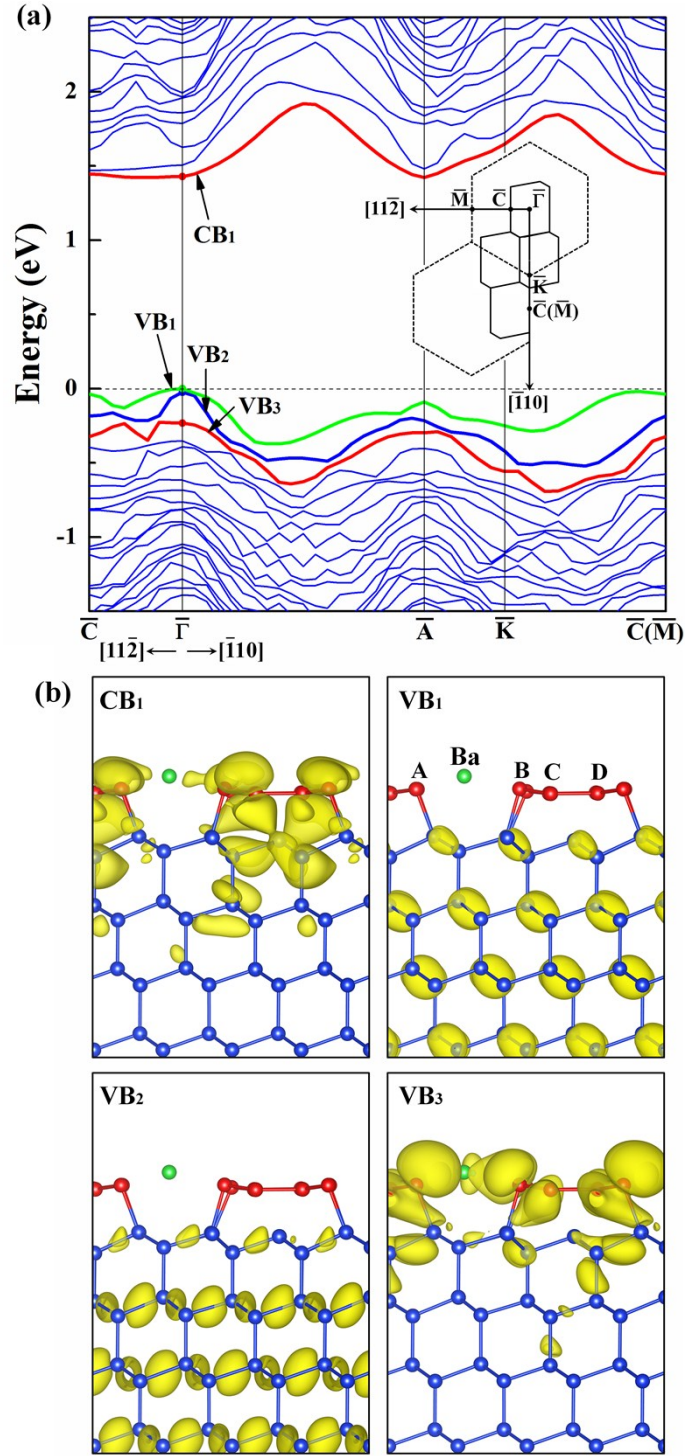

FIG. S2: (a) Calculated electronic band structure of Ba/Si(111)-3 $\times$ 2 surface using HSE06 functional. Horizontal dotted line gives the Fermi level that is set to zero. (b) The band-decomposed charge density distributions at  $\bar{\Gamma}$  point. VB<sub>1</sub>, VB<sub>2</sub> and VB<sub>3</sub> represent the first, second and third valence band, respectively, and CB<sub>1</sub> represent the

first conduction band. The color spacing is  $0.005 \text{ e}/\text{\AA}^3$ . The Si atoms in the first layer are plotted in red, the other Si atoms are in blue, and the AEM atoms are in green.

#### REFERENCES

- [1] W. H. Du and J. J. Yang, *Surf. Sci.*, 2016, **653**, 222.
